# Supplementary material for: Combined Targeting of Estrogen Receptor Alpha and Exportin 1 in Metastatic Breast Cancers
Source: PubMed Central journal article supplement (PMC7563274; doi:10.3390/cancers12092397), 2020-08-24
Supplement: cancers-12-02397-s001.pdf [file cancers-12-02397-s001.pdf]

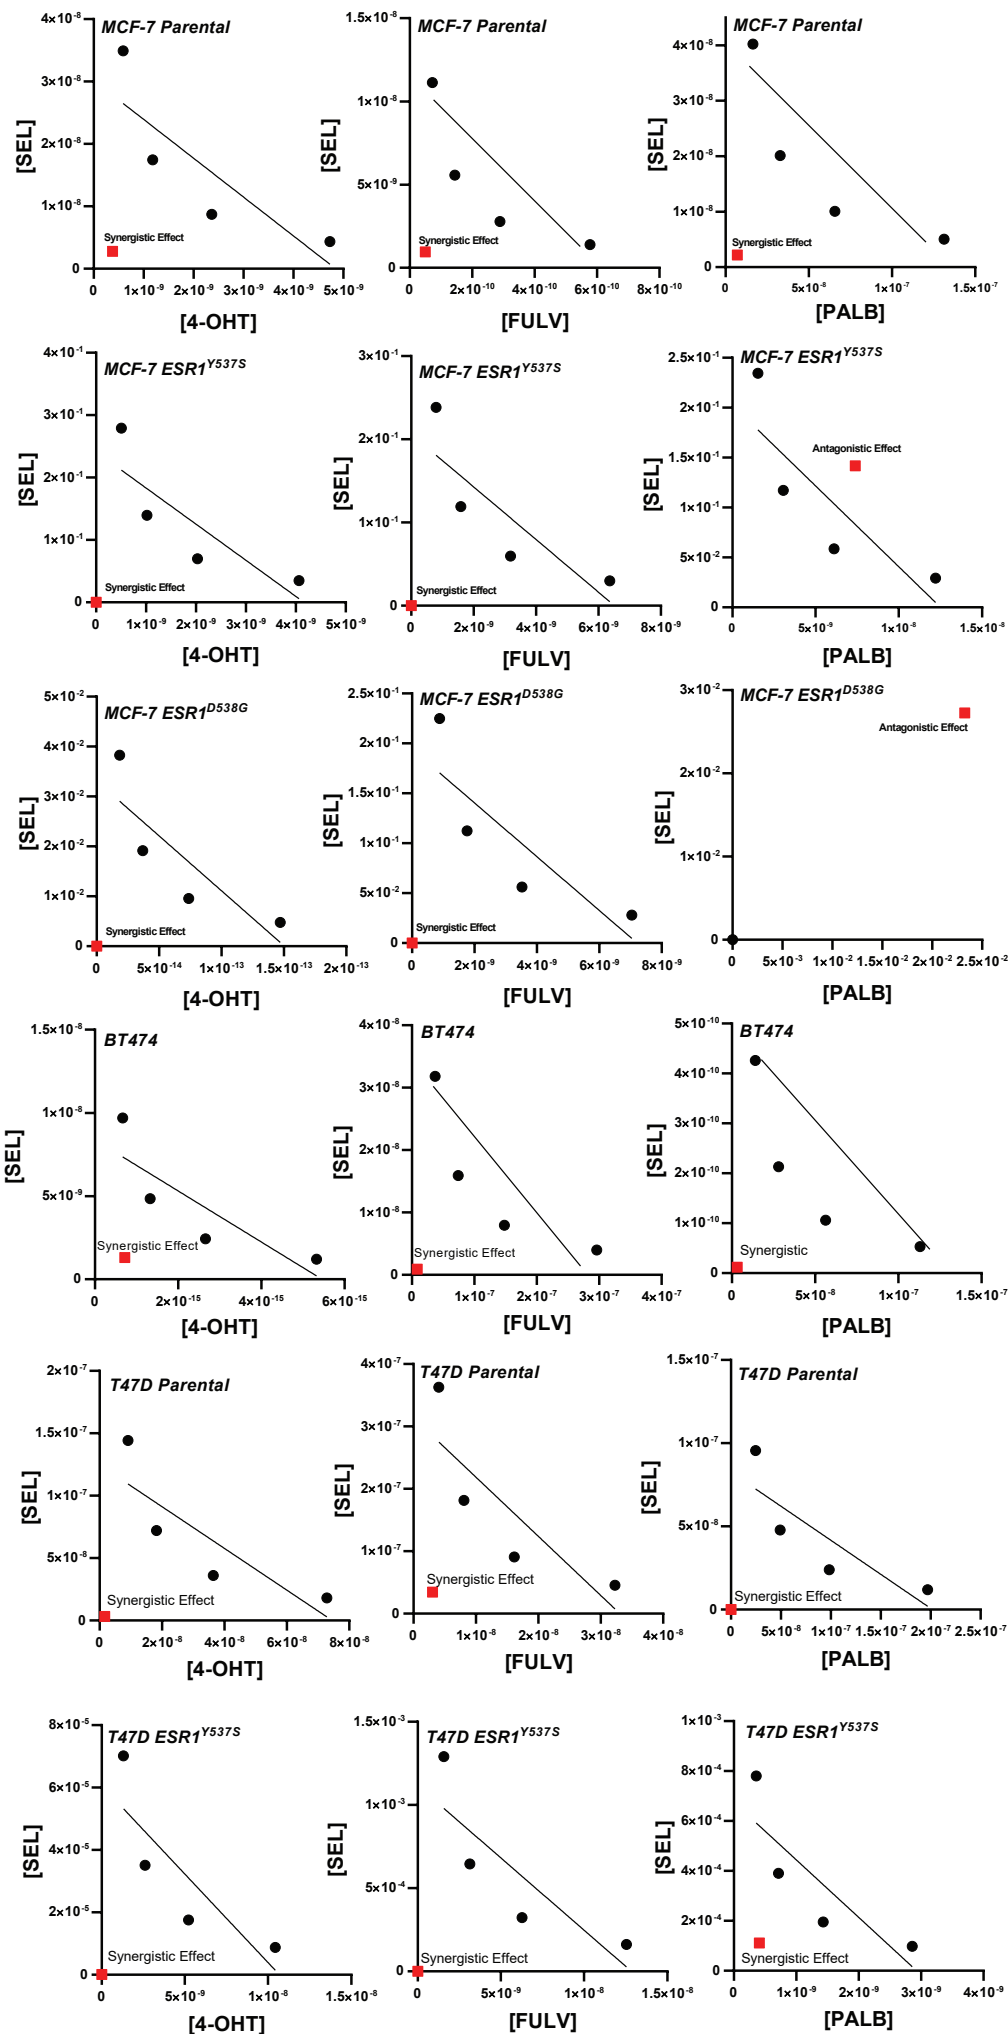

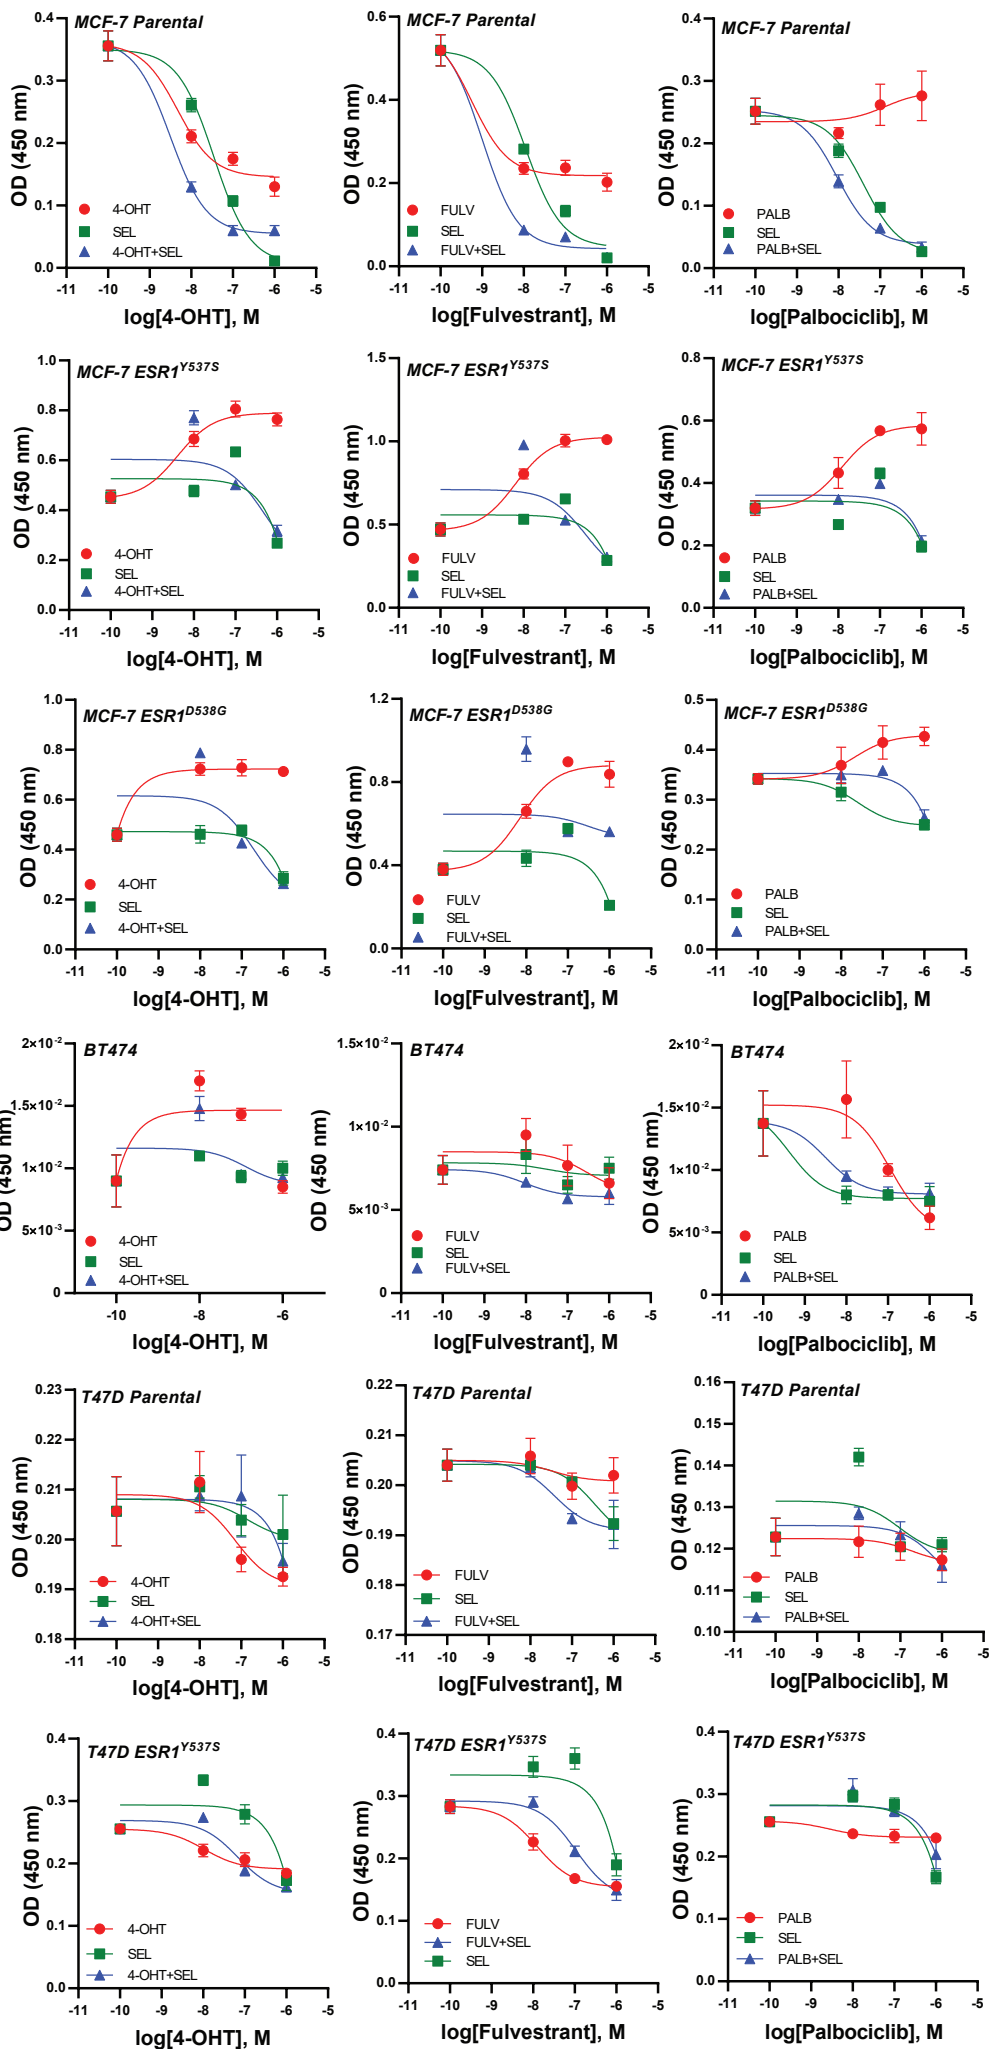

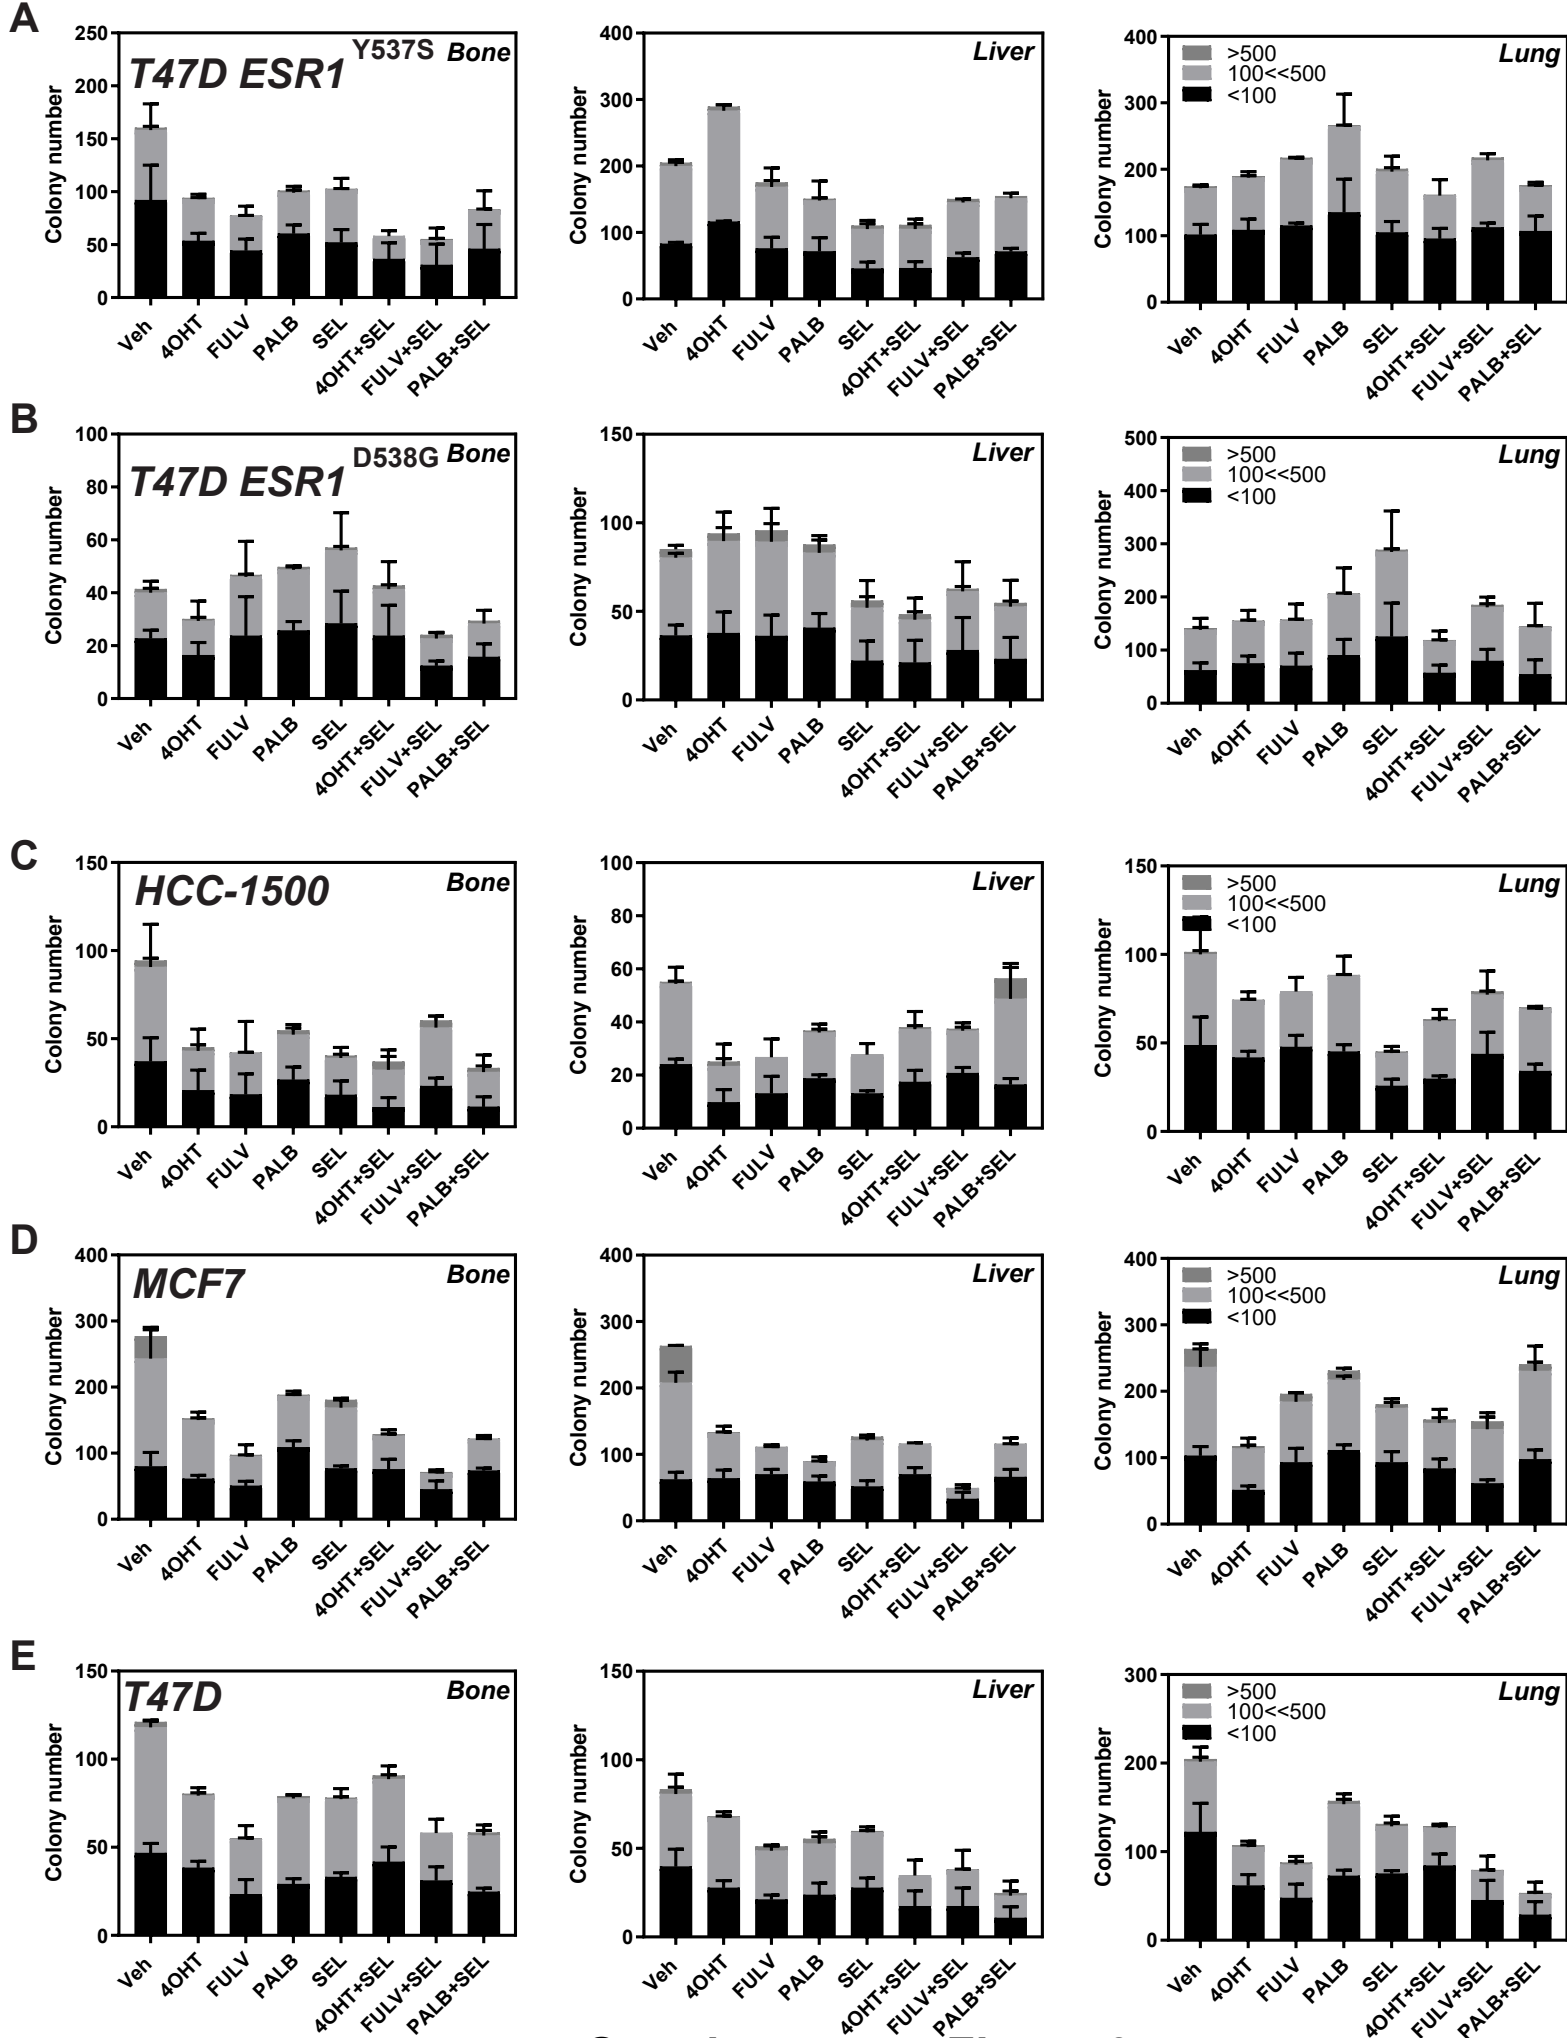

**Supplementary Figure 3**

**A**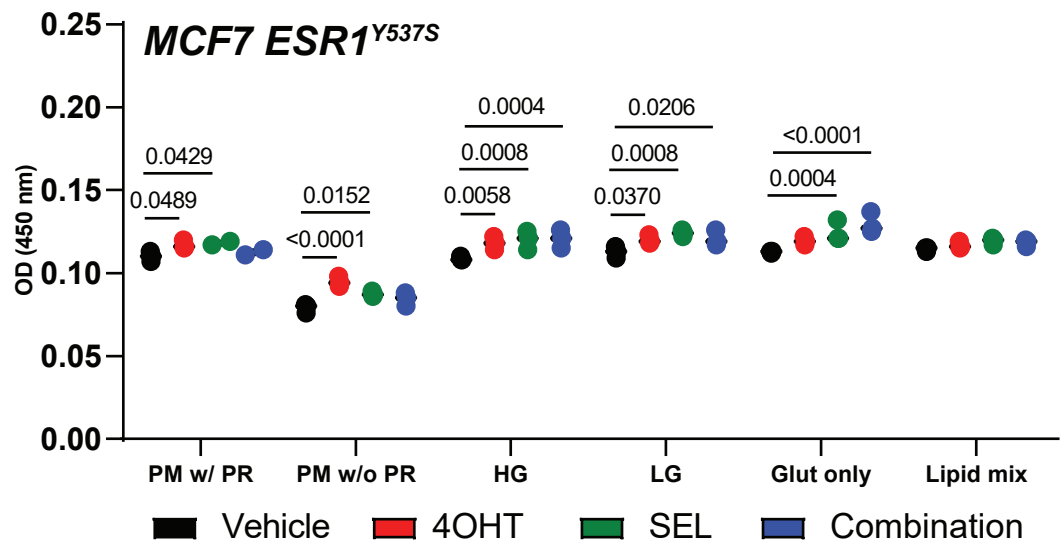**B**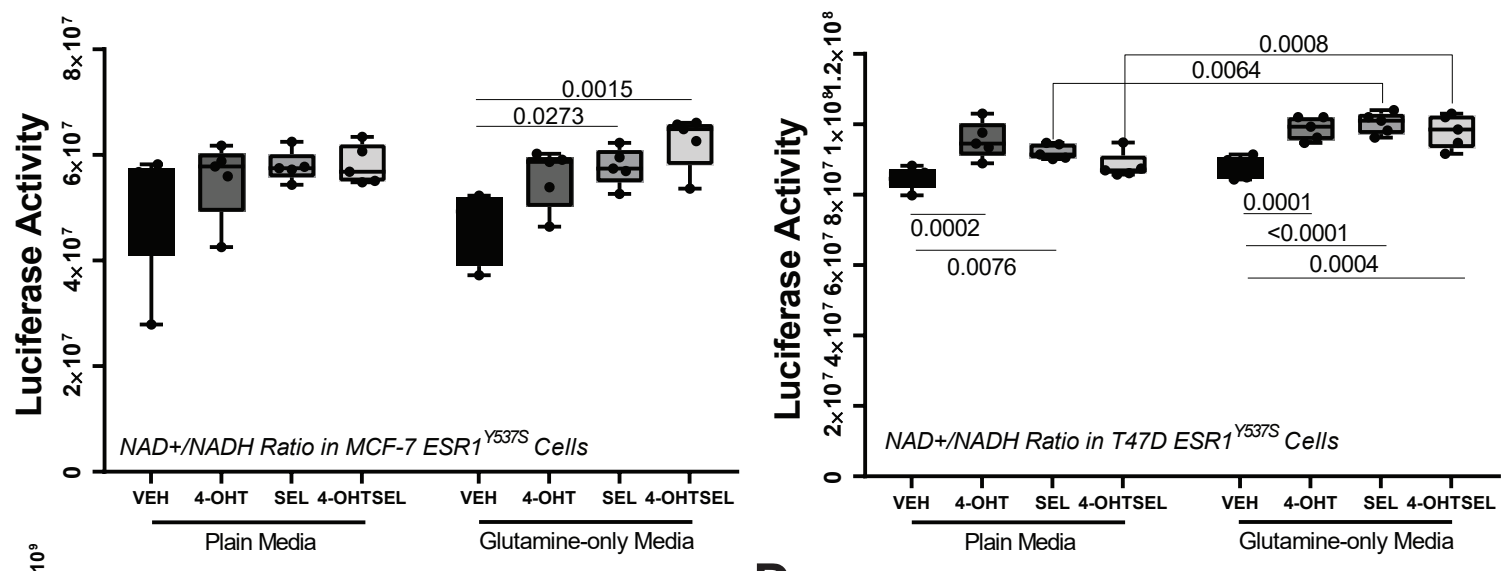**C**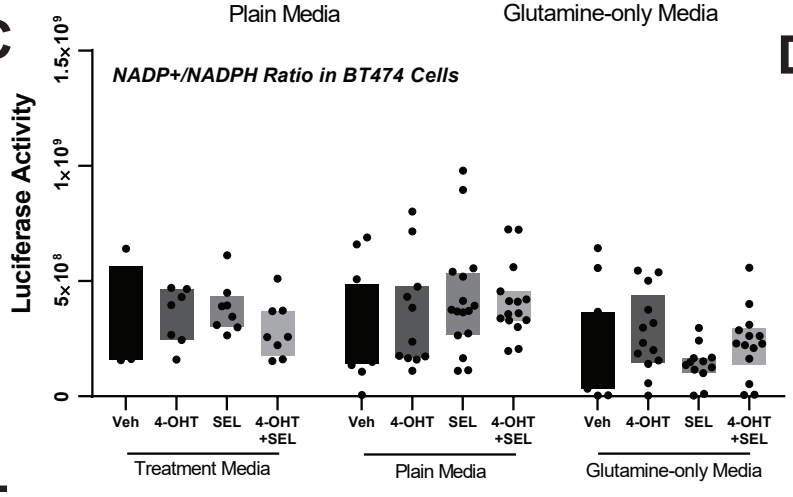**D**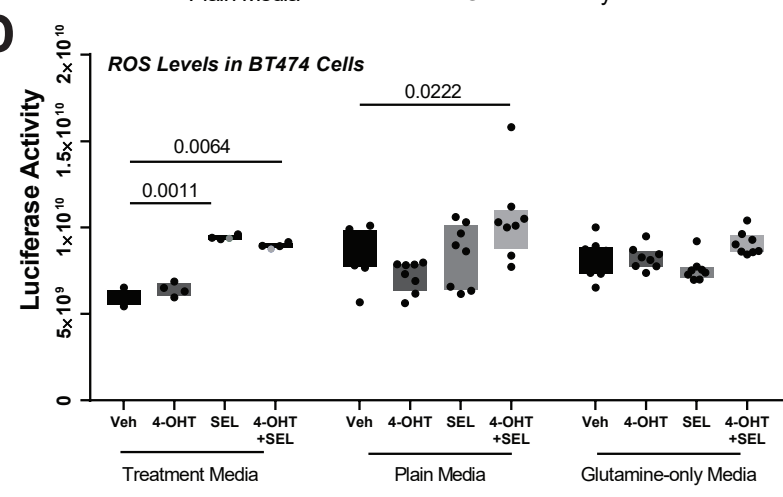**E**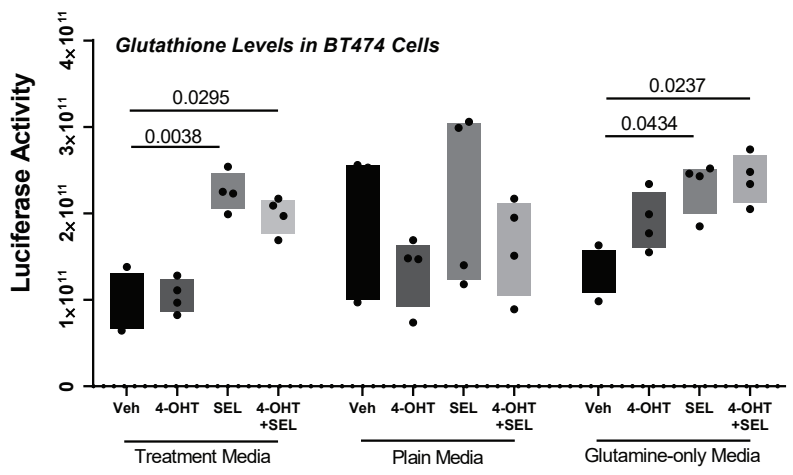

**A****T47D Parental Cells**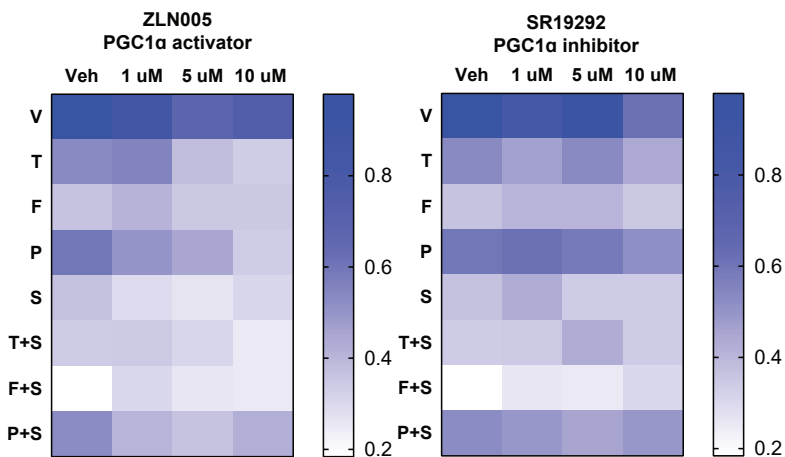**B****T47D ESR1<sup>Y537S</sup>**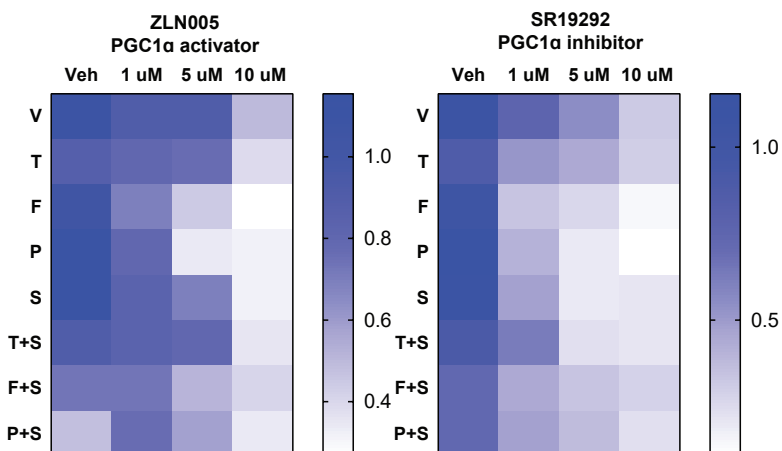**C****MOOTA PGC1 Targets**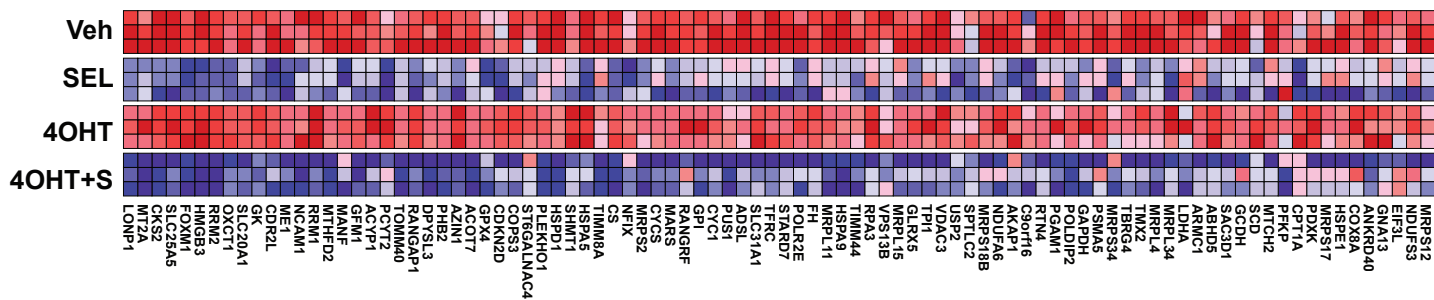**Supplementary Figure 5**

**Supplementary Figure 1. Isobologram analysis of 4-OHT, Fulv or Palb and SEL combinations in various cell lines**

**Supplementary Figure 2. Dose-response of 4-OHT, Fulv or Palb with or without SEL**

**Supplementary Figure 3. Colony formation assay for T47D-*ESR1*<sup>Y537S</sup>, T47D-*ESR1D*<sup>538G</sup>, HCC1500, MCF7 or T47D cells.**

**Supplementary Figure 4. A.** Cell viability assay showing the effect of glutamine addition to the minimal media. MCF7-*ESR1*<sup>Y537S</sup> cells were cultured at a density of  $2 \times 10^3$  cells/well in a 96-well plate and treated with 1  $\mu$ M 4-OHT alone and in combination with 100 nM SEL in different minimal media conditions. **B.** NAD<sup>+</sup>/NADH assay in MCF7-*ESR1*<sup>Y537S</sup>, MCF7-*ESR1D*<sup>538G</sup>. NADP<sup>+</sup>/NADPH ratios **C.**, reactive oxygen species (ROS) **D.** and Glutathione levels **E.** were quantified by using different luminescence-base assays. For each test kit, BT474 cells were seeded at a density of  $2 \times 10^3$  in 96-well plates and treated with 1  $\mu$ M 4-OHT in combination with 100 nM SEL. Experimental statistics were analyzed by using GraphPad<sup>®</sup> Prism8 software. A two-way analysis of variance (ANOVA) model was used for statistical significance of treatment and values were presented as mean  $\pm$  SEM from three independent experimental repeats. Significances were compared according to first measurement values for each treatment condition.

**Supplementary Figure 5. Cell viability assays for T47D (A.) and T47D-*ESR1*<sup>Y537S</sup> cells B.** that were treated with 4-OHT or SEL combinations in the presence of ZLN005 or SR19292. **C.** MOOTHA PGC1 targets gene expression data from RNA-Seq experiment.
